# Supplementary material for: Exploration of unconventional π–hole and C–H⋯H–C types of supramolecular interactions in a trinuclear Cd(ii) and a heteronuclear Cd(ii)–Ni(ii) complex and experimental evidence for preferential site selection of the ligand by 3d and 4d metal ions
Source: Royal Society of Chemistry journal article supplement (doi:10.1039/c6ra04428j), 2016-01-01
Supplement: c6ra04428j1.pdf [file c6ra04428j1.pdf]

### Supplementary Information

| Compound | $\lambda_{\text{ex}}$<br>(nm) | $\lambda_{\text{em}}$<br>(nm) | $\tau$ (nS) | $\chi^2$ |
|----------|-------------------------------|-------------------------------|-------------|----------|
| 1        | 353                           | 492                           | 0.3244      | 1.004603 |

Table S1. Details of Life time study of Complex 1.

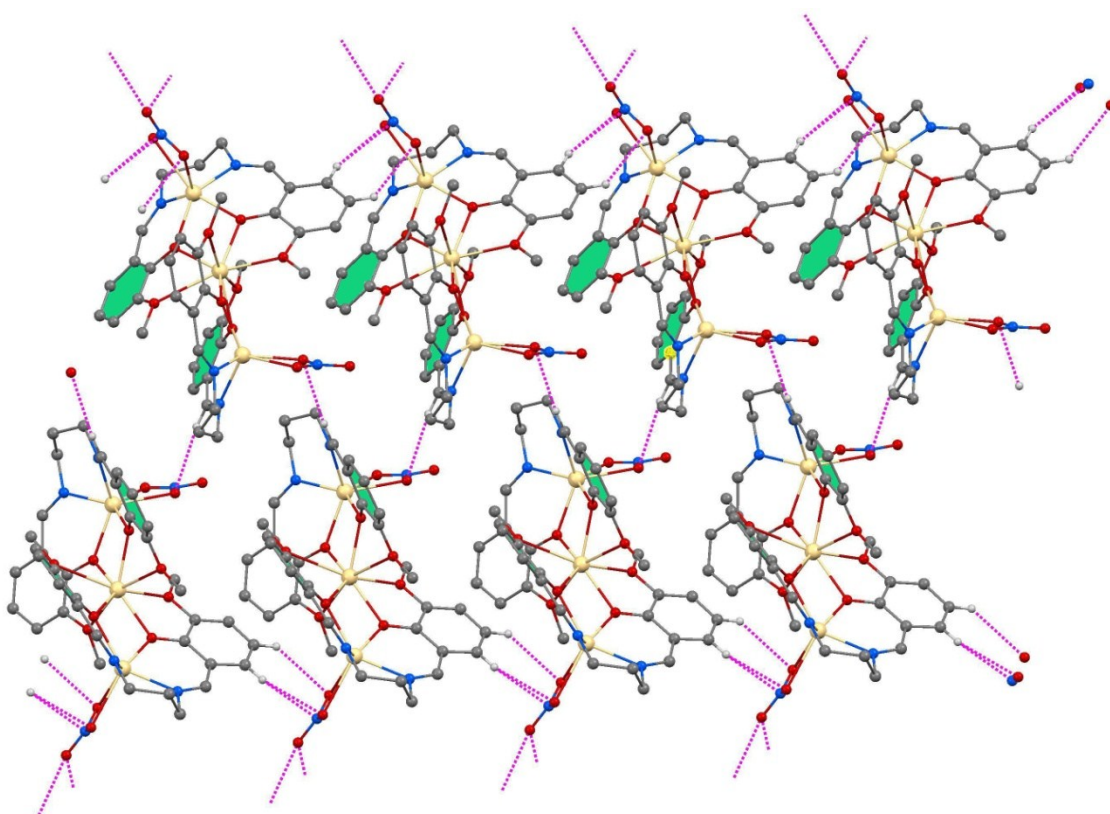

Fig. S1. 2D supramolecular sheet of complex 1 showing CH... $\pi$  and  $\pi$ -hole interactions. Hydrogen atoms of least interest are omitted for clarity.

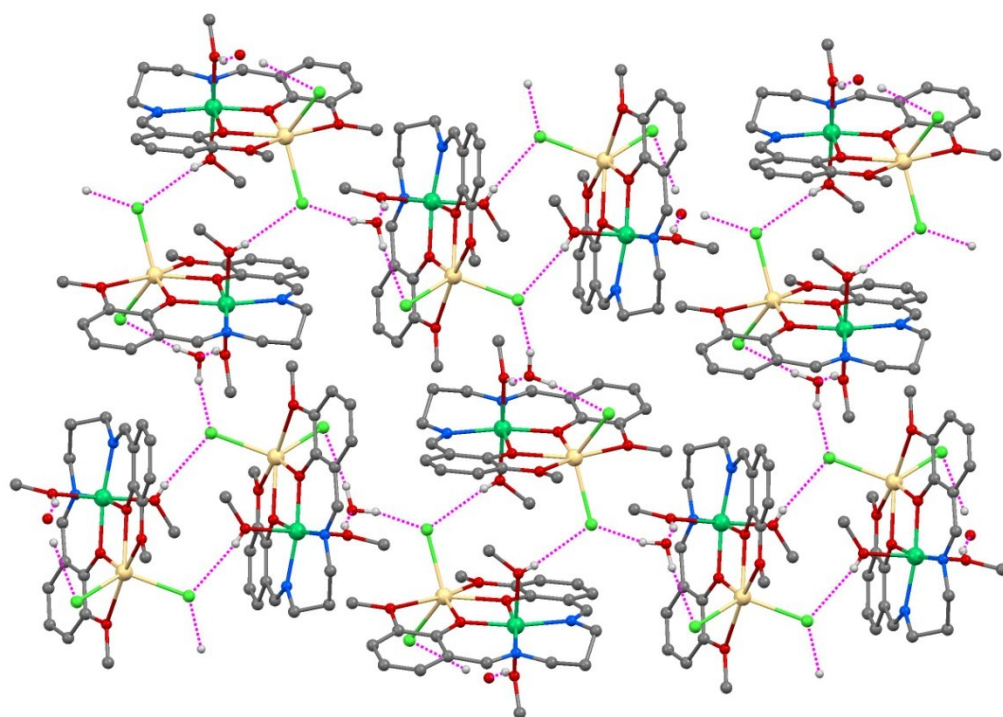

Fig. S2. 2D supramolecular sheet of complex **2** propagating along the *bc* plane showing CH... $\pi$  and H-bonding interaction. Hydrogen atoms of least interest are omitted for clarity.

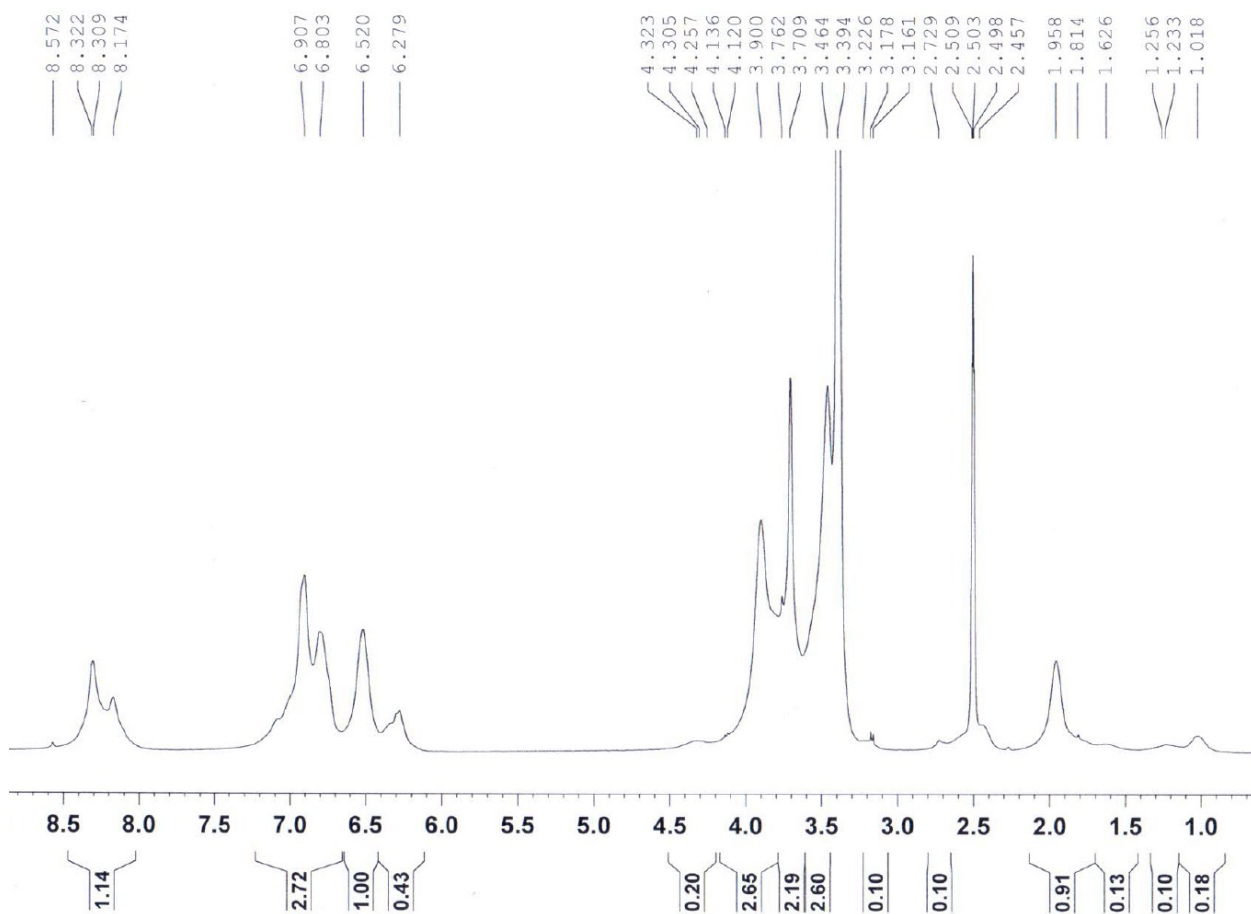

Fig. S3. <sup>1</sup>H NMR spectrum of complex 1 in DMSO-d<sub>6</sub>.

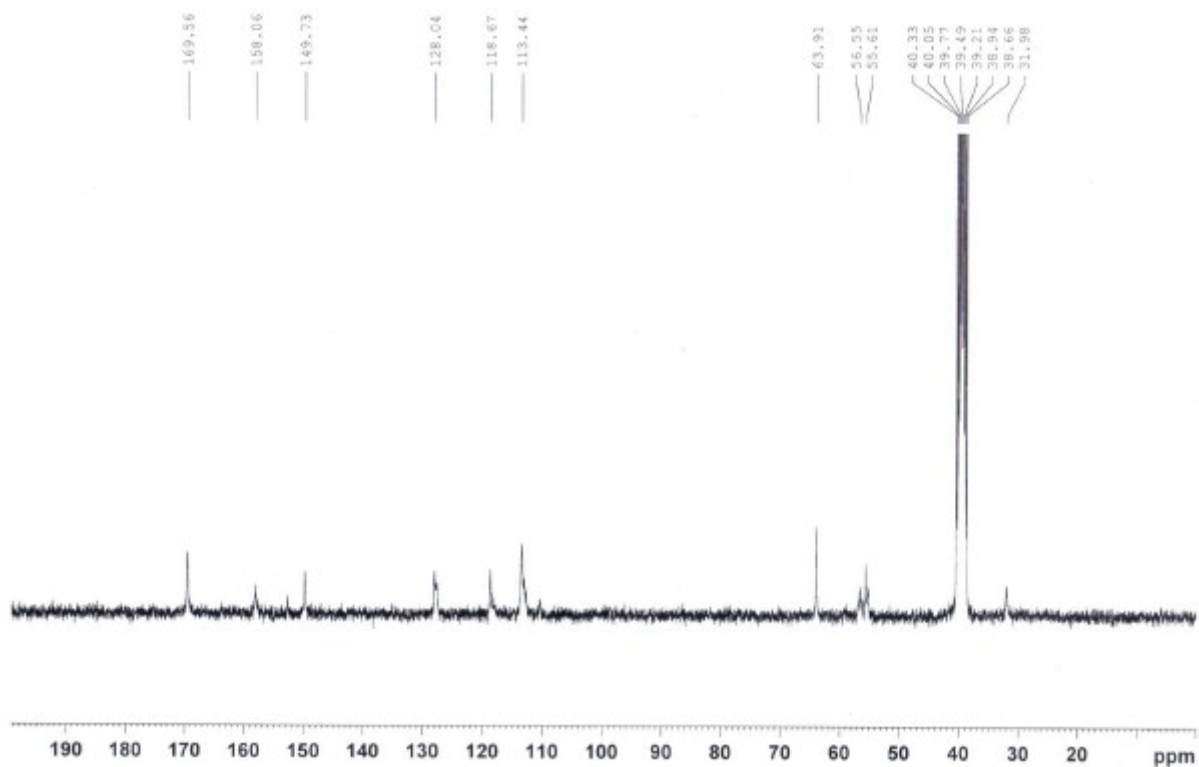

Fig. S4.  $^{13}\text{C}$ NMR spectrum of complex **1** in  $\text{DMSO-d}_6$ .

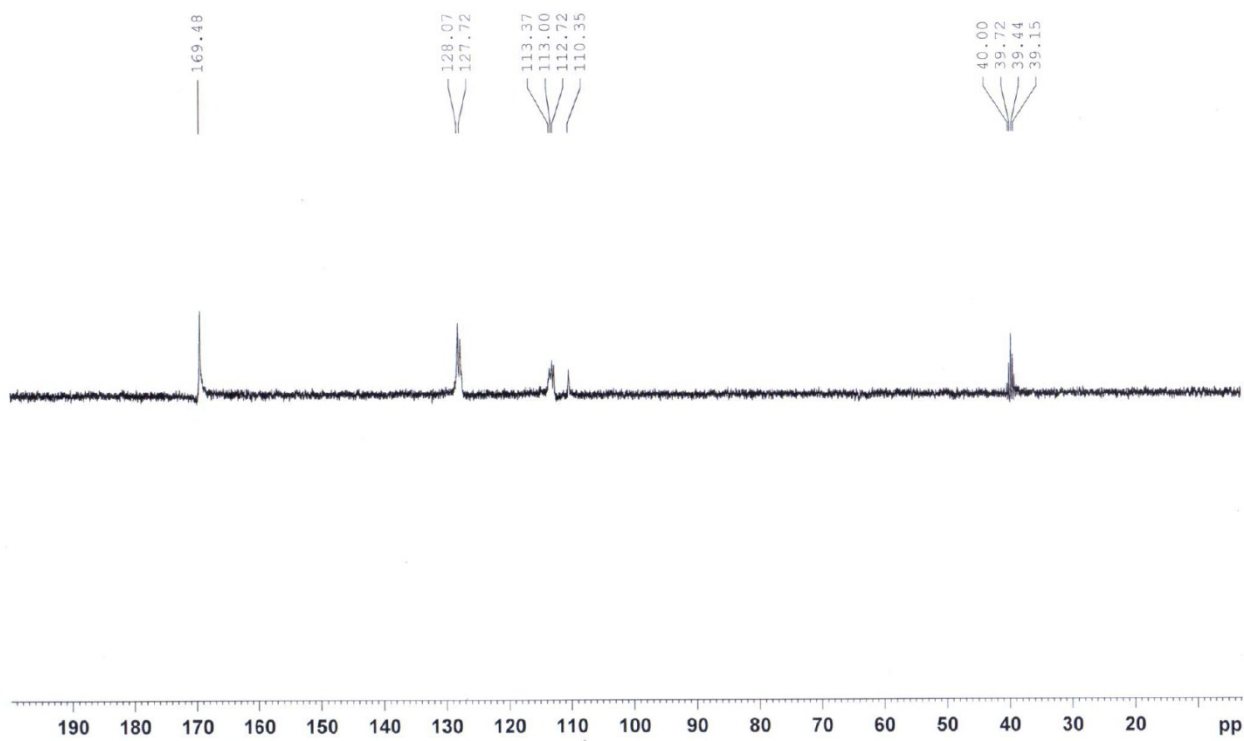

Fig. S5.  $^{13}\text{C}$ NMR-DEPT90 spectrum of complex **1** in  $\text{DMSO-d}_6$ .

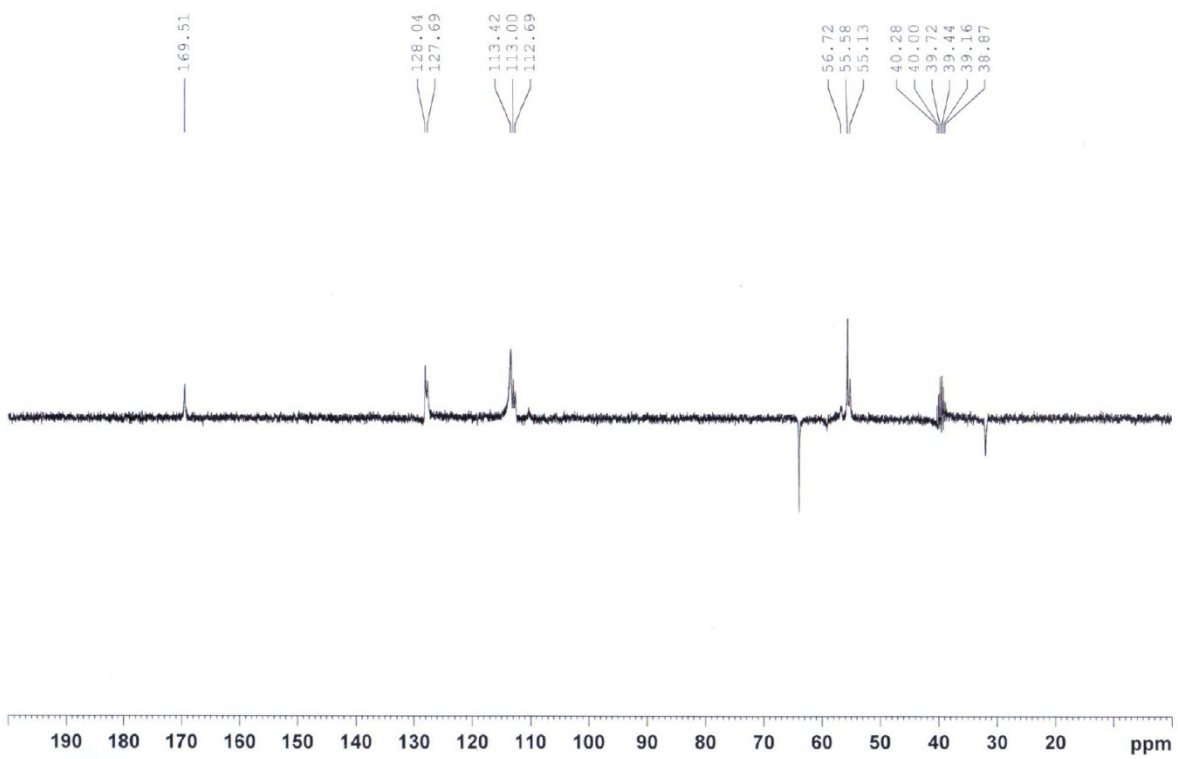

Fig. S6.  $^{13}\text{C}$ NMR-DEPT135 spectrum of complex **1** in  $\text{DMSO-d}_6$ .

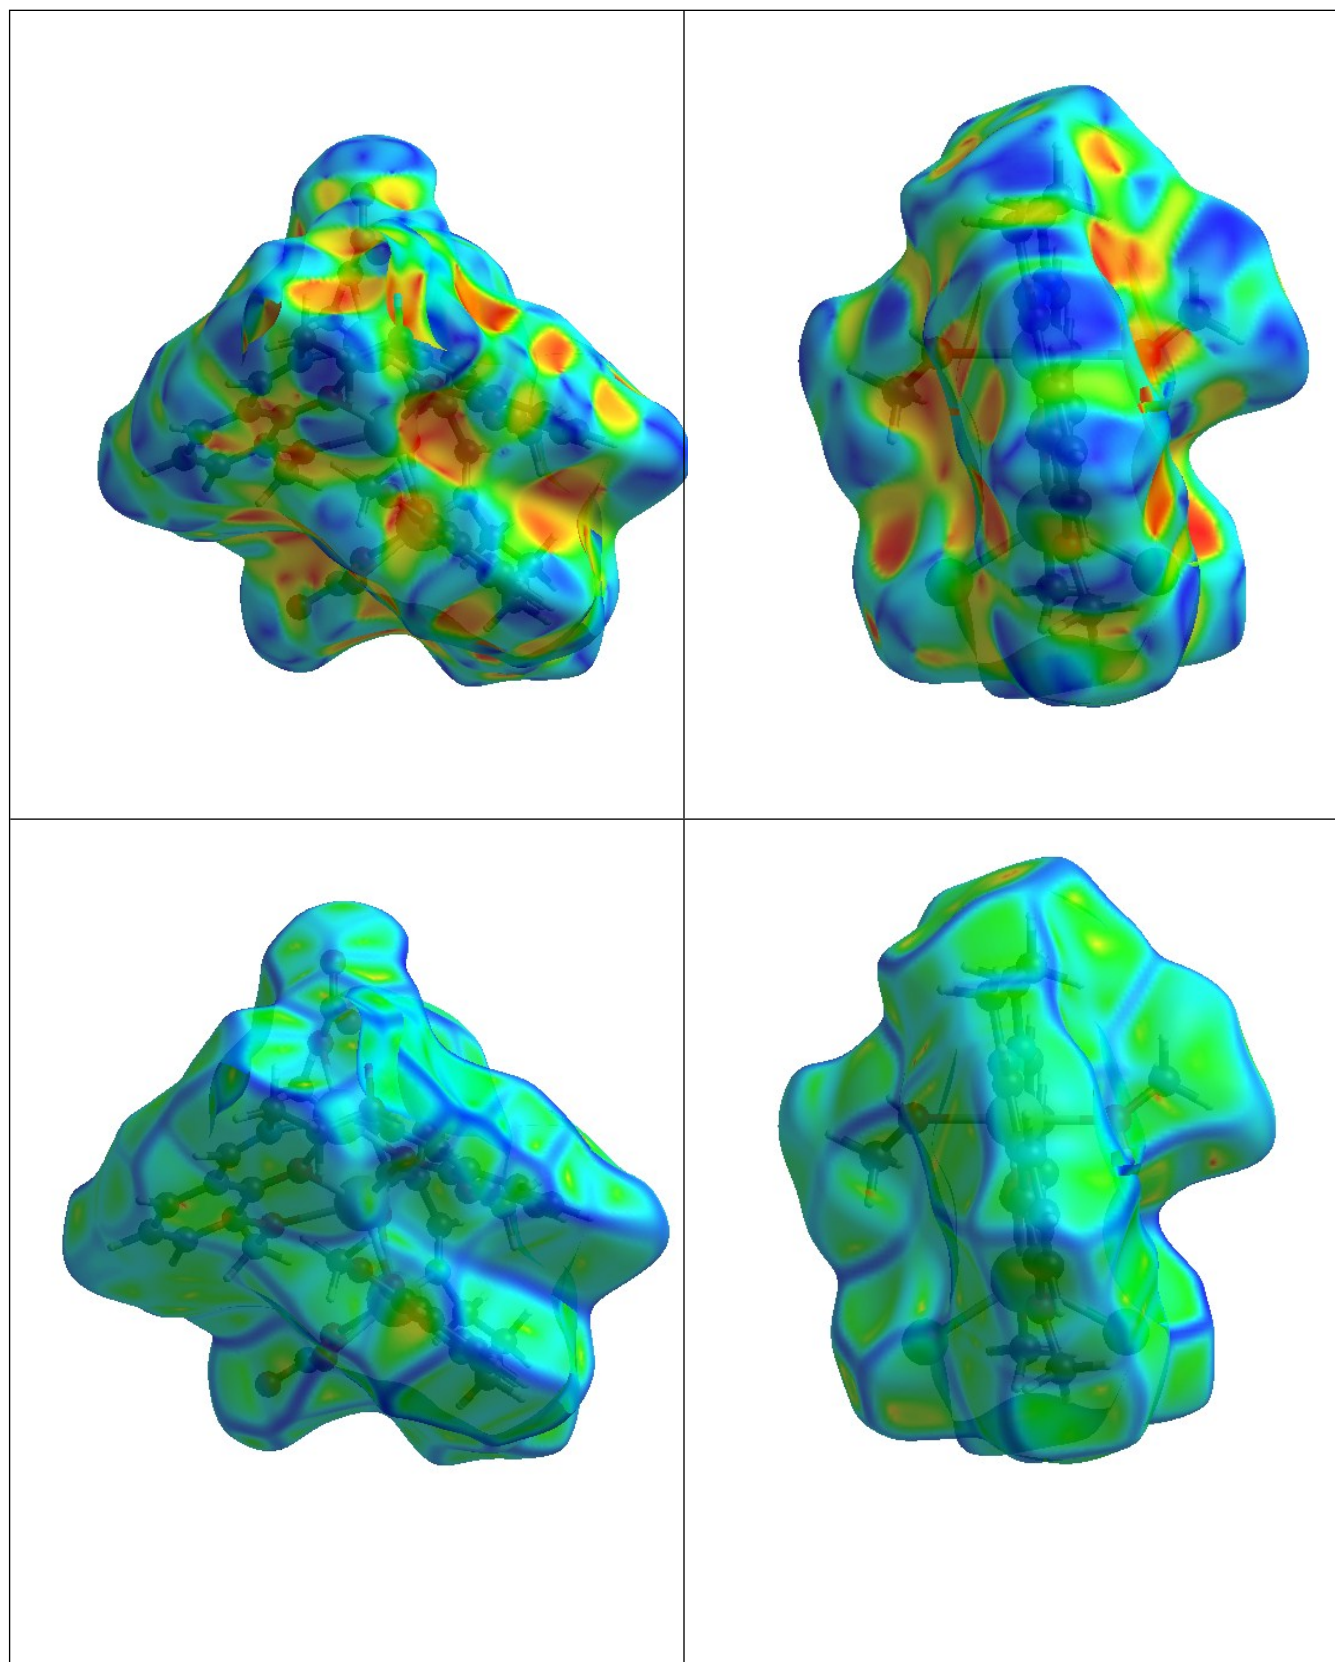

Fig. S7. Hirshfeld Surface mapped over Shape Index (top) and Curvedness(bottom) for complexes **1** (left)and **2**(right).



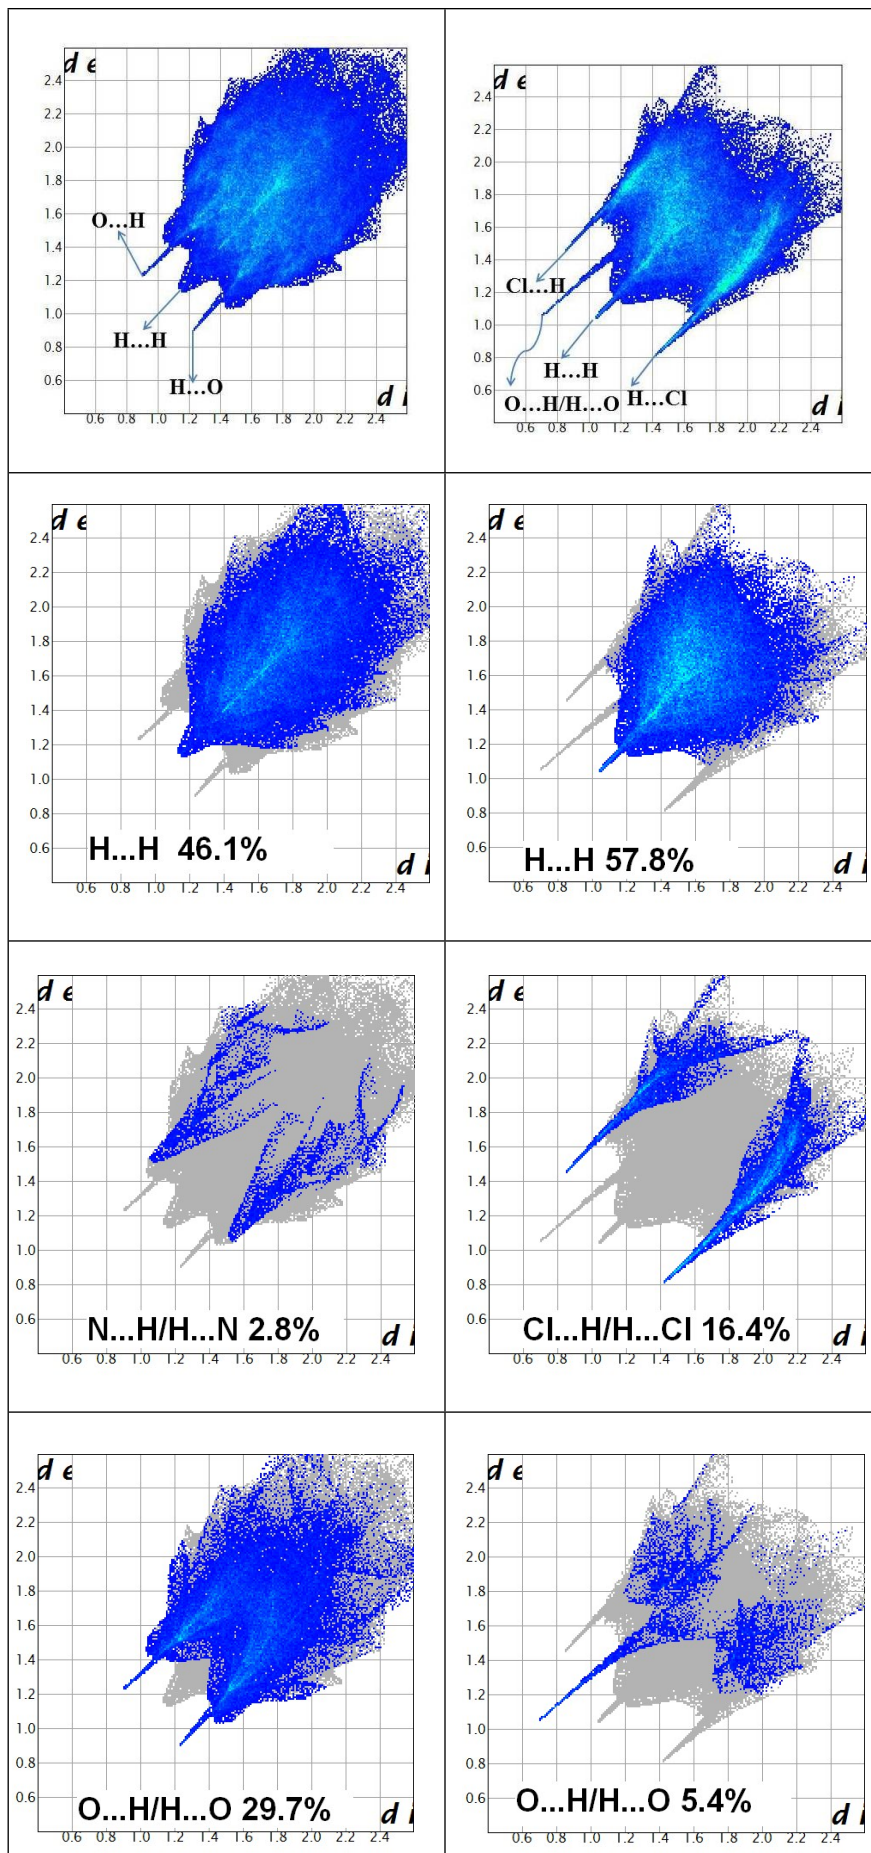

Fig. S8. Fingerprint plot of Complex **1** (Left) and **2** (Right) showing total interactions (Top), only X...H/H...X contacts (middle) and O...H/H...O contacts (bottom) respectively.
